# Supplementary material
Source: PubMed Central journal article supplement (PMC3188736)

**A**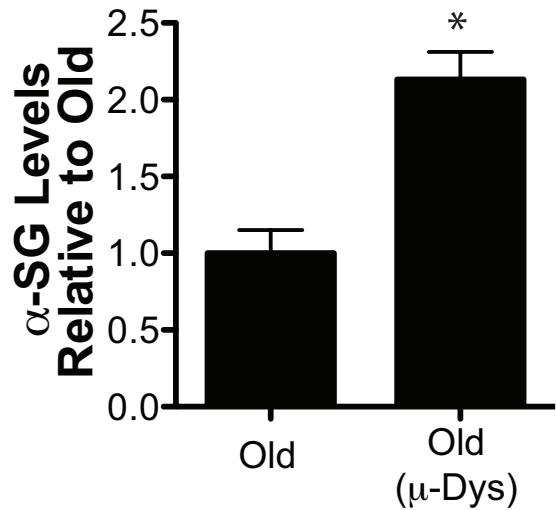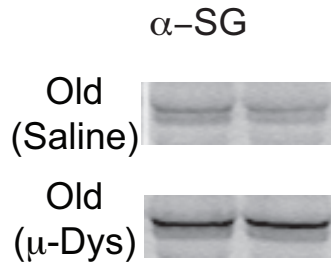

Supplement: mt2011120x1.pdf [file mt2011120x1.pdf]
